# Supplementary material for: Reduction of Device Operating Temperatures with Graphene-Filled Thermal Interface Materials
Source: MDPI journal article supplement (doi:10.3390/c7030053), 2021-07-21
Supplement: s1 [file s1]

Supplementary Information

**Reduction of Device Operating Temperatures With Graphene-filled Thermal Interface Materials**

Jacob S. Lewis<sup>1</sup>

Phonon Optimized Engineered Materials (POEM) Center, Bourns College of Engineering, University of California – Riverside, Riverside, California, 92521, USA

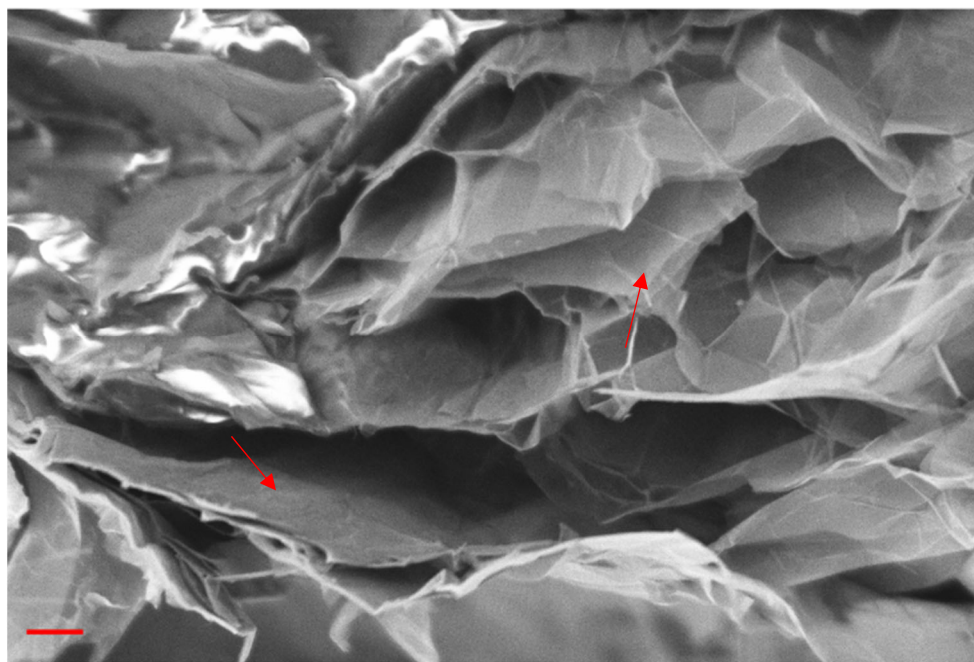

**Figure S1.** SEM of a 5.4 vol.% graphene filler TIM sample's fractured surface. Regions of the composite that is primarily epoxy are seen as white charging spots. The scale bar corresponds to a distance of 2 microns. Arrows point to some of the FLG in view. Reproduced from [1]. CC BY 3.0.

---

<sup>1</sup> Email: [jlewi014@ucr.edu](mailto:jlewi014@ucr.edu)

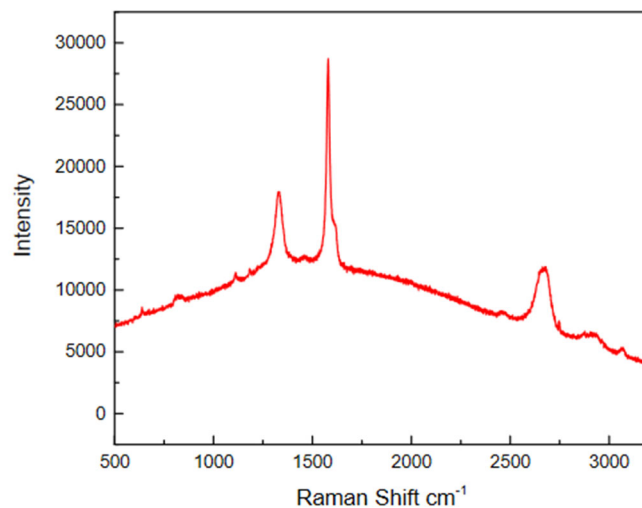

**Figure S2.** Raman spectrum of a 5.4 vol.% graphene filler loading TIM. Characteristic D, G, and 2D peaks of graphene are present. Reproduced from [1]. CC BY 3.0.

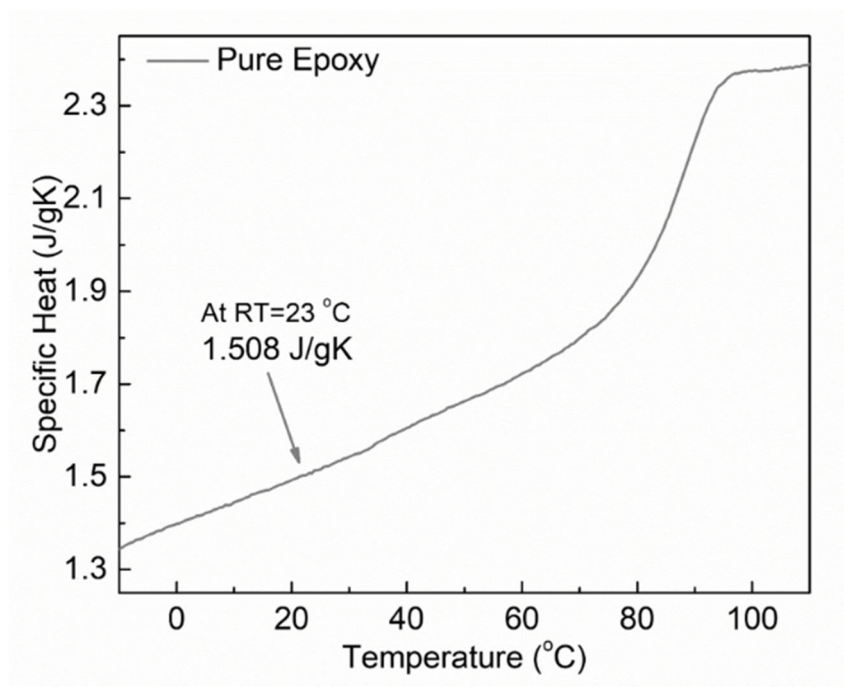

**Figure S3.** Differential Scanning Calorimetry results of the Diglycidyl ether of Bisphenol A hardened with Triethylenetetramine (at a quantity of 12% of the weight of the resin). Reproduced from [1]. CC BY 3.0.

## References

J. S. Lewis, T. Perrier, A. Mohammadzadeh, F. Kargar, and A. A. Balandin, “Power cycling and reliability testing of epoxy-based graphene thermal interface materials,” *C — J. Carbon Res.*, 6, p. 26, 2020.
